# Supplementary material for: New Insights into the Methylation of Mycobacterium tuberculosis Heparin Binding Hemagglutinin Adhesin Expressed in Rhodococcus erythropolis
Source: MDPI journal article supplement (doi:10.3390/pathogens10091139), 2021-09-04
Supplement: s1 [file s1]

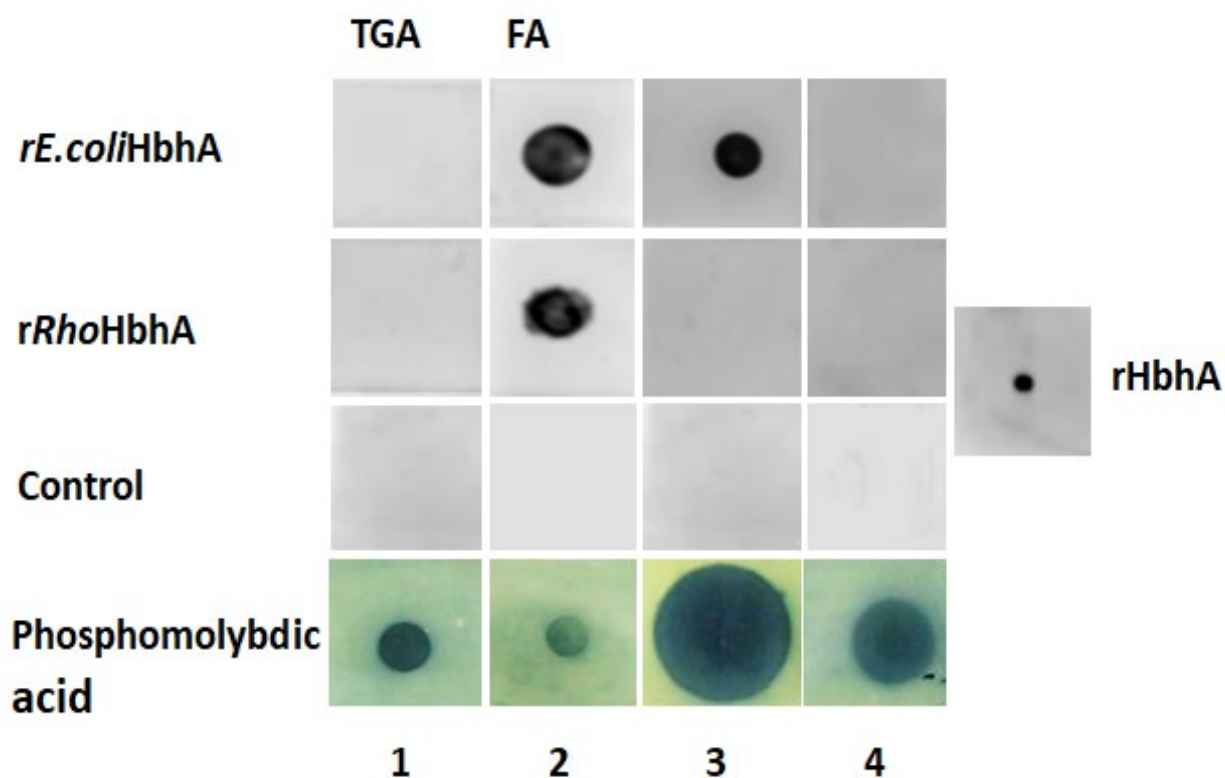

**Figure S1.** Dot Lipid-binding assays with TAG, glyceril trioleate (line 1) stearic acid (line 2), oleic acid, (line 3) and mineral oil (line 4) were spotted on PVDF membranes and incubated with *rE.coliHbhA* and *rRhoHbhA*. In control row, *rHbhA* proteins were omitted. Control of *rHbhA* protein used for the assay spotted to membrane and developed with R-antiHbhA is also shown. Phosphomolybdic acid stain was carried out to confirm the presence of lipids on membrane.
